# Supplementary material for: Initial combination therapy of macitentan and tadalafil in pulmonary arterial hypertension
Source: PubMed Central journal article supplement — Eur Respir J. 2020 Sep 3;56(3):2000673. doi: 10.1183/13993003.00673-2020 (PMC7469971; doi:10.1183/13993003.00673-2020), 2020-09-03
Supplement: ERJ-00673-2020.Shareable.pdf [file ERJ-00673-2020.Shareable.pdf]

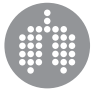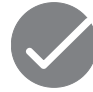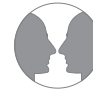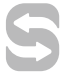

SHAREABLE PDF

# Initial combination therapy of macitentan and tadalafil in pulmonary arterial hypertension

Olivier Sitbon <sup>1</sup>, Vincent Cottin <sup>2</sup>, Matthieu Canuet <sup>3</sup>, Pierre Clerson<sup>4</sup>,  
Virginie Gressin<sup>5</sup>, Loïc Perchenet<sup>5</sup>, Laurent Bertoletti <sup>6,7</sup>, Hélène Bouvaist<sup>8</sup>,  
François Picard<sup>9</sup>, Grégoire Prévot<sup>10</sup>, Emmanuel Bergot<sup>11</sup> and  
Gérald Simonneau<sup>1</sup>

**Affiliations:** <sup>1</sup>APHP, National Reference Centre for Pulmonary Hypertension, Dept of Respiratory and Intensive Care Medicine, Bicêtre Hospital, University Paris-Sud – University Paris Saclay, INSERM UMR\_S999, Le Kremlin-Bicêtre, France. <sup>2</sup>National Reference Centre for Rare Pulmonary Diseases, Dept of Pneumology, Louis Pradel Hospital, Claude Bernard University Lyon 1, UMR754, Lyon, France. <sup>3</sup>Dept of Pneumology, Nouvel Hôpital Civil, Strasbourg, France. <sup>4</sup>Soladis Clinical Studies, Biostatistics, Roubaix, France. <sup>5</sup>Actelion Pharmaceuticals Ltd, Allschwil, Switzerland. <sup>6</sup>Dept of Vascular Medicine and Therapeutics, Saint-Étienne University Hospital Centre, Saint-Étienne, France. <sup>7</sup>INSERM (National Institute of Health and Medical Research) U1059 and INSERM CIC1408, Saint-Étienne, France. <sup>8</sup>Cardiology Service, Michallon Hospital, Grenoble University Hospital Centre, Grenoble, France. <sup>9</sup>Heart Failure Unit and Pulmonary Hypertension Expert Centre, Bordeaux University Hospital, Bordeaux, France. <sup>10</sup>Dept of Pneumology, University Hospital, Toulouse, France. <sup>11</sup>Dept of Pneumology, University Hospital, Caen, France.

**Correspondence:** Olivier Sitbon, Service de Pneumologie, CHU Bicêtre, 78 rue du Général Leclerc, 94275 Le Kremlin-Bicêtre, France. E-mail: olivier.sitbon@u-psud.fr

 @ERSpublications

**Initial combination therapy with macitentan and tadalafil is well tolerated and improves cardiopulmonary haemodynamics and functional capacity in newly diagnosed PAH patients** <https://bit.ly/3aWZagH>

**Cite this article as:** Sitbon O, Cottin V, Canuet M, *et al.* Initial combination therapy of macitentan and tadalafil in pulmonary arterial hypertension. *Eur Respir J* 2020; 56: 2000673 [<https://doi.org/10.1183/13993003.00673-2020>].

This single-page version can be shared freely online.

*To the Editor:*

Initial combination therapy plays a central role in managing pulmonary arterial hypertension (PAH) [1–4]. Patients with low- or intermediate-risk of 1-year mortality at diagnosis should be treated with initial combination therapy with an endothelin receptor antagonist (ERA) and phosphodiesterase type-5 inhibitor (PDE5i) [2–4]. Benefits of initial therapy with the ERA ambrisentan and PDE5i tadalafil were demonstrated in AMBITION [1]; prospective evidence for other treatment combinations within these drug classes is needed.
